# Supplementary material
Source: PubMed Central journal article supplement (PMC4288262)
Supplement: supp_M114.043703_mcp.M114.043703-1.pdf [file supp_M114.043703_mcp.M114.043703-1.pdf]

| Protein name <sup>a, b</sup>                                         | Peptide sequence <sup>c</sup>                                 | Glycan modification <sup>d</sup> | Mass / charge and precursor charge   | Accuracy (ppm) <sup>e</sup> | Sample type   |
|----------------------------------------------------------------------|---------------------------------------------------------------|----------------------------------|--------------------------------------|-----------------------------|---------------|
| <b>Cell Surface CSPGs</b>                                            |                                                               |                                  |                                      |                             |               |
| <sup>9</sup> Brain-specific angiogenesis inhibitor 2                 | <sup>250</sup> ALVPGGPAPPAAEADLHSGSSNDLFTTEM <sup>278</sup>   |                                  | 1310.910; 3+                         | + 7.5                       | CSF           |
| CD44 antigen                                                         | <sup>163</sup> TNPEDIYPSNPTDDDVS <sup>186</sup>               |                                  | 1188.130; 3+                         | + 4.2                       | Urine         |
|                                                                      |                                                               |                                  | 1214.782; 3+                         | + 3.4                       |               |
| <sup>a, b</sup> CD99L2 protein                                       | <sup>132</sup> YGSNDDPGSGGFLNPEAPVGHVK <sup>156</sup>         |                                  | 1103.128; 3+                         | + 4.7                       | CSF           |
| CSPG5                                                                | <sup>35</sup> EAGSAVEAEELVK <sup>46</sup>                     |                                  | 775.659; 3+                          | + 5.4                       | CSF           |
| HLA class II histocompatibility antigen gamma chain                  | <sup>275</sup> LELEDPSGLGVT <sup>288</sup>                    |                                  | 1259.506; 2+                         | + 5.7                       | Urine         |
| <sup>9</sup> Plexin domain-containing protein                        | <sup>24</sup> GAGHDEGPGSGWAAK <sup>38</sup>                   |                                  | 797.306; 3+                          | - 1.1                       | CSF and Urine |
|                                                                      |                                                               |                                  | 823.959; 3+                          | - 3.6                       |               |
| Receptor-type tyrosine-protein phosphatase R                         | <sup>22</sup> FSGNNDHFLAINQK <sup>35</sup>                    |                                  | 866.695; 3+                          | + 2.6                       | CSF           |
| <b>Extracellular Matrix CSPGs</b>                                    |                                                               |                                  |                                      |                             |               |
| Basement membrane-specific heparan sulfate proteoglycan core protein | <sup>4187</sup> DWHLEGSGGN <sup>4196</sup>                    |                                  | 1032.876; 3+                         | + 6.9                       | CSF and Urine |
| Brevican core protein                                                | <sup>403</sup> GAIYSIPIMEDGGGSSTPEDPAEAPR <sup>429</sup>      |                                  | 1249.832; 3+                         | + 3.9                       | CSF           |
| Collagen alpha-1 (XV) chain                                          | <sup>231</sup> TPEELCDPEESSASGETSGLQE <sup>251</sup>          |                                  | 1142.413; 3+                         | + 5.5                       | Urine         |
| Decorin                                                              | <sup>31</sup> DEASGIGPEVPDDR <sup>44</sup>                    |                                  | 1265.455; 3+                         | + 4.0                       | CSF and Urine |
| <sup>9</sup> Laminin subunit alpha-4                                 | <sup>28</sup> DDNAFPFDIEGSSAVGR <sup>44</sup>                 |                                  | 930.704; 3+                          | + 2.9                       | Urine         |
|                                                                      |                                                               |                                  | 957.359; 3+                          | + 5.2                       |               |
| <sup>9</sup> Matrix-remodeling-associated protein 5                  | <sup>691</sup> VREDIVEDEGGSGMGDEENTSR <sup>712</sup>          |                                  | 1125.445; 3+                         | + 7.1                       | CSF           |
| Neurocan core protein                                                | <sup>358</sup> AHHPTSQHGDLETPSSGDEGEILSAEGPPVR <sup>388</sup> |                                  | 840.964; 5+                          | + 3.5                       | CSF           |
|                                                                      |                                                               |                                  | 1070.936; 4+                         | - 1.7                       |               |
|                                                                      |                                                               |                                  | 1299.275; 4+ (without modifications) | + 4.5                       |               |

|                                                                           |                                                                     |  |              |       |               |
|---------------------------------------------------------------------------|---------------------------------------------------------------------|--|--------------|-------|---------------|
| Neurocan core protein                                                     | <sup>389</sup> ELEPTLEEEVVTPDFQEPLVSSGEEETLILEEK <sup>422</sup>     |  | 1220.800; 4+ | 4.4   | CSF           |
| <sup>3</sup> Osteopontin                                                  | <sup>223</sup> DSYETSQLDDQSAETHSHK <sup>241</sup>                   |  | 793.557; 4+  | + 1.5 | CSF and Urine |
|                                                                           |                                                                     |  | 1084.394; 3+ | + 2.7 |               |
| <sup>3</sup> Osteopontin                                                  | <sup>302</sup> ISHELDSASSEVN <sup>314</sup>                         |  | 1230.941; 2+ | + 1.2 | CSF and Urine |
| Versican core protein                                                     | <sup>1526</sup> DTEVGHQAHEHTEPVSLFPEESSGGEIAIDQESQK <sup>1559</sup> |  | 951.610; 5+  | + 4.0 | CSF and Urine |
| <b>Intracellular Granules CSPGs</b>                                       |                                                                     |  |              |       |               |
| Bone marrow proteoglycan                                                  | <sup>53</sup> ELEEEEWGSGSEDASK <sup>69</sup>                        |  | 1452.545; 3+ | + 8.1 | Urine         |
|                                                                           |                                                                     |  | 1492.512; 3+ | - 2.2 |               |
| <sup>3</sup> Cholecystokinin                                              | <sup>21</sup> QPVPADPAGSGLQR <sup>35</sup>                          |  | 822.683; 3+  | + 1.4 | CSF and Urine |
| Chromogranin-A                                                            | <sup>419</sup> KEEEGSANR <sup>427</sup>                             |  | 671.587; 3+  | - 4.6 | CSF and Urine |
|                                                                           |                                                                     |  | 698.242; 3+  | - 5.3 |               |
| <sup>3</sup> Collagen and calcium-binding EGF domain-containing protein 1 | <sup>382</sup> DLGSGDDHPR <sup>391</sup>                            |  | 687.921; 3+  | - 2.2 | Urine         |
|                                                                           |                                                                     |  | 1071.358; 3+ | + 0.1 |               |
| <sup>3</sup> Dermcidin                                                    | <sup>20</sup> YDPEAASAPGSGNPCHEASAAQK <sup>42</sup>                 |  | 1103.433; 3+ | + 1.0 | Urine         |
|                                                                           |                                                                     |  | 1130.084; 3+ | + 0.5 |               |
| <sup>3</sup> Neuropeptide W                                               | <sup>120</sup> APEPALEPESLDFSGAGQR <sup>138</sup>                   |  | 988.752; 3+  | + 4.9 | CSF and Urine |
|                                                                           |                                                                     |  | 1015.405; 3+ | + 2.9 |               |
| <sup>3</sup> Secretogranin-1                                              | <sup>88</sup> DPADASEAHSSSR <sup>101</sup>                          |  | 817.970; 3+  | + 2.0 | CSF and Urine |
|                                                                           |                                                                     |  | 844.625; 3+  | + 1.0 |               |
| <sup>3</sup> Secretogranin-1                                              | <sup>235</sup> SSQESGEETGSQENHPQESK <sup>254</sup>                  |  | 1046.734; 3+ | + 3.6 | CSF           |
| <sup>3</sup> Secretogranin-3                                              | <sup>35</sup> ELSAERPLNEQIAEAEEDK <sup>53</sup>                     |  | 1055.451; 3+ | + 3.4 | Urine         |
| <b>Miscellaneous CSPGs</b>                                                |                                                                     |  |              |       |               |
| Bikunin                                                                   | <sup>206</sup> AVLPQEEEGSGGGQLVTEVTK <sup>226</sup>                 |  | 1041.125; 3+ | + 0.4 | CSF and Urine |
|                                                                           |                                                                     |  | 1067.779; 3+ | - 2.1 |               |
|                                                                           |                                                                     |  | 1094.437; 3+ | + 4.7 |               |

|                          |                                                              |                                                                                   |              |       |               |
|--------------------------|--------------------------------------------------------------|-----------------------------------------------------------------------------------|--------------|-------|---------------|
| Bikunin                  | <sup>206</sup> AVLPQEEEG <u>SGGG</u> QLVTEVTK <sup>226</sup> | 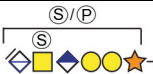 | 1094.432; 3+ | + 2.7 | CSF and Urine |
| <sup>a</sup> Neuroserpin | <sup>394</sup> VMHPETMNT <u>SG</u> HDFEEL <sup>410</sup>     |  | 989.718; 3+  | + 6.8 | CSF           |

<sup>a</sup>Indicate novel CSPGs identified in this study.

<sup>b</sup>Identified in searches against NCBI nr.

<sup>c</sup>Bold and underlined serine residues depict established attachment sites while bold depict probable attachment sites.

<sup>d</sup>The CS-hexasaccharide were identified either without or with sulfate (SO<sub>3</sub><sup>-</sup>) and/or phosphate (PO<sub>3</sub><sup>-</sup>) modifications and their positions on the hexasaccharide structure are indicated. The positioning and distinction of sulfate- (79.9663 Da) and phosphate (79.9568 Da) modifications were made by manually evaluating the MS2-spectra. When the expected modifications could not be identified a bracket including the whole hexasaccharide structure is presented as the expected modification could be, in theory, anywhere on the glycan.

<sup>e</sup>The accuracy denotes the difference between the theoretical and the measured mass for a randomly selected precursor ion of each CS-glycopeptide. For CS-glycopeptides where the nature of the expected modification could not be determined (i.e. sulfate- or phosphate) the theoretical mass is calculated based on the assumption of a sulfate modification.
